# Supplementary material for: Novel Human Anti-PD-L1 mAbs Inhibit Immune-Independent Tumor Cell Growth and PD-L1 Associated Intracellular Signalling
Source: PubMed Central journal article supplement (PMC6739323; doi:10.1038/s41598-019-49485-3), 2019-09-11

**Full-length blot of Figure 5**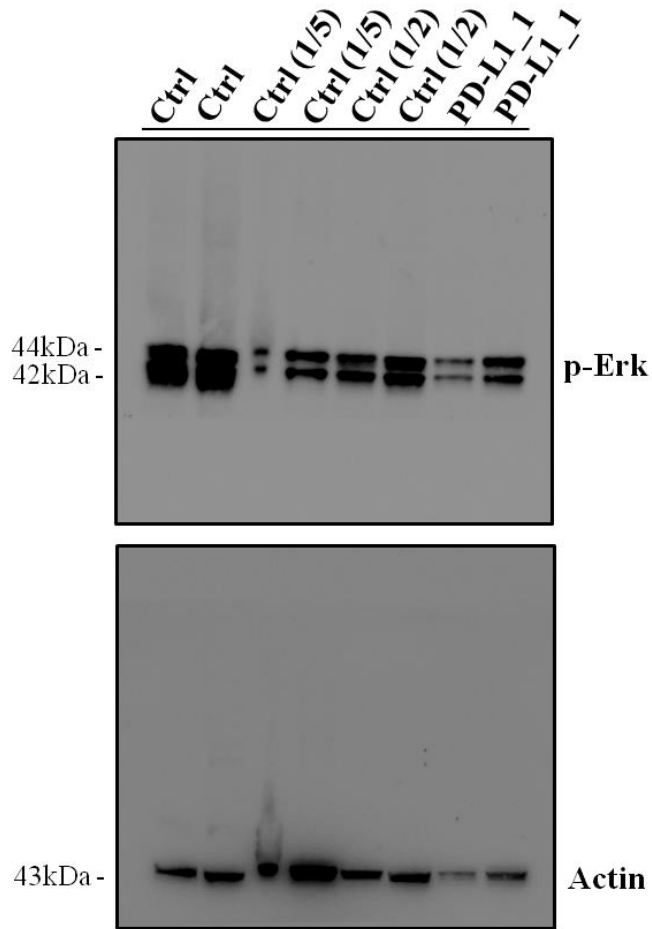**Full-length blot of Supplementary Figure S2**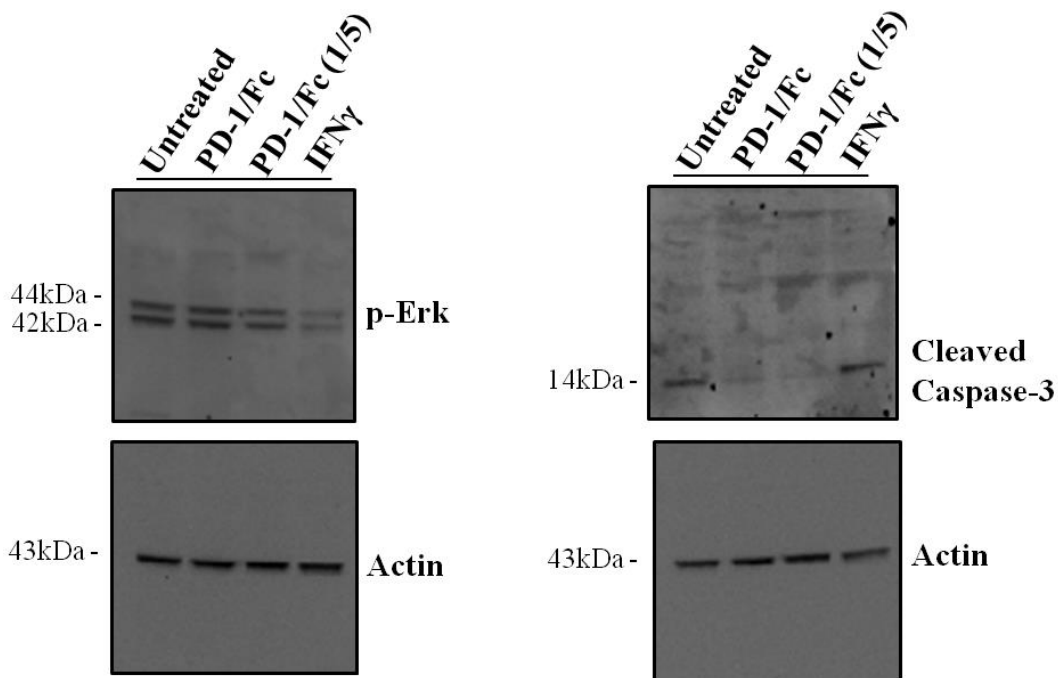

Supplement: 41598_2019_49485_MOESM2_ESM.pdf [file 41598_2019_49485_MOESM2_ESM.pdf]
